# Supplementary material
Source: MDPI journal article supplement (https://www.mdpi.com/2076-0760/7/11/242)
Supplement: s1 [file s1]

# CNG Freeway Station Refueling Survey

Station: \_\_\_\_\_

Date \_\_\_\_/\_\_\_\_/14 Time \_\_\_\_\_

Survey Number \_\_\_\_\_

(1) Can you refill this CNG vehicle at home? ☐ Yes ☐ No

(2) Do you or other members of your household own any other vehicles? ☐ Yes ☐ No

If so, what are they? Please write the number of vehicles next to the vehicle type:

|                    |  |                  |  |        |  |                |  |                 |  |              |  |
|--------------------|--|------------------|--|--------|--|----------------|--|-----------------|--|--------------|--|
| Gasoline           |  | Diesel           |  | Hybrid |  | Plug-in Hybrid |  | Flex-Fuel (E85) |  | Hydrogen     |  |
| CNG – Orig. Equip. |  | CNG – After Mkt. |  | LNG    |  | Propane        |  | Biodiesel       |  | All-Electric |  |

(3) What are your approximate home cross-streets? \_\_\_\_\_ and \_\_\_\_\_  
In which city? \_\_\_\_\_

(4) Where was your last stop immediately before this refueling stop?  
\_\_\_\_\_ and \_\_\_\_\_ In which city? \_\_\_\_\_

(4a) What type of activity was this?

☐ Home ☐ Work ☐ Shopping ☐ Social/Dining ☐ School ☐ Other

(5) Where is your next stop immediately after this refueling stop?  
\_\_\_\_\_ and \_\_\_\_\_ In which city? \_\_\_\_\_

(5a) What type of activity was this?

☐ Home ☐ Work ☐ Shopping ☐ Social/Dining ☐ School ☐ Other

(6) What was your fuel tank level when you arrived at this station (before refueling)?

☐ Fuel Light on ☐ 1/8 tank ☐ 1/4 tank ☐ 3/8 tank ☐ 1/2 tank ☐ > 1/2 tank

(7) Which exit/ramp did you take when leaving a freeway to access this station? \_\_\_\_\_

\_\_\_\_ Did not exit a freeway on this trip

(8) Which entrance/ramp will you take when to access a freeway after refueling? \_\_\_\_\_

\_\_\_\_ Will not re-enter a freeway on this trip

### Convenience Questions

(9) I refueled at this CNG refueling station because it is close to my home location.

| Strongly Agree (1) | Agree (2) | Neutral (3) | Disagree (4) | Strongly Disagree (5) | Not Applicable |
|--------------------|-----------|-------------|--------------|-----------------------|----------------|
|                    |           |             |              |                       |                |

(10) I refueled at this CNG refueling station because it is close to my place of work.

| Strongly Agree (1) | Agree (2) | Neutral (3) | Disagree (4) | Strongly Disagree (5) | Not Applicable |
|--------------------|-----------|-------------|--------------|-----------------------|----------------|
|                    |           |             |              |                       |                |

(11) I refueled at this CNG refueling station because it is close to a major trip anchor nearby (e.g., mall, arena/stadium/concert venue, etc.)

| Strongly Agree (1) | Agree (2) | Neutral (3) | Disagree (4) | Strongly Disagree (5) | Not Applicable |
|--------------------|-----------|-------------|--------------|-----------------------|----------------|
|                    |           |             |              |                       |                |

(12) I refueled at this CNG refueling station because it is conveniently on the way between my origin and destination.

| Strongly Agree (1) | Agree (2) | Neutral (3) | Disagree (4) | Strongly Disagree (5) | Not Applicable |
|--------------------|-----------|-------------|--------------|-----------------------|----------------|
|                    |           |             |              |                       |                |

(13) This CNG station is a safe, comfortable environment in which to refuel.

| Strongly Agree (1) | Agree (2) | Neutral (3) | Disagree (4) | Strongly Disagree (5) | Not Applicable |
|--------------------|-----------|-------------|--------------|-----------------------|----------------|
|                    |           |             |              |                       |                |

(14) This CNG station is easily visible from the freeway.

| Strongly Agree (1) | Agree (2) | Neutral (3) | Disagree (4) | Strongly Disagree (5) | Not Applicable |
|--------------------|-----------|-------------|--------------|-----------------------|----------------|
|                    |           |             |              |                       |                |

(15) It is easy to access this CNG station from the freeway.

| Strongly Agree (1) | Agree (2) | Neutral (3) | Disagree (4) | Strongly Disagree (5) | Not Applicable |
|--------------------|-----------|-------------|--------------|-----------------------|----------------|
|                    |           |             |              |                       |                |

(16) Low fuel price was an important factor in me refueling at this station.

| Strongly Agree (1) | Agree (2) | Neutral (3) | Disagree (4) | Strongly Disagree (5) | Not Applicable |
|--------------------|-----------|-------------|--------------|-----------------------|----------------|
|                    |           |             |              |                       |                |

(17) Does congestion on the nearby freeway make you avoid this station at certain times of day?

☐ **Yes**      ☐ **No**      If yes, what times of day would you avoid this station? \_\_\_\_\_

(18) How did you find out about this refueling station? Check all that apply.

☐ Road signs    ☐ Passing by here on a past trip    ☐ Internet Search    ☐ Internet community group (such as cngchat.com)    ☐ Advertising    ☐ Word of mouth    ☐ GPS    ☐ Contractual obligation to refuel (if fleet)

(19) How often do you refuel here?

☐ rarely (0-20%)    ☐ occasionally (20-40%)    ☐ relatively often (40-60%)    ☐ frequently (60-80%)    ☐ most of the time (80%+)

(19a) If less than 40%, at which station do you primarily refuel?

(20) What other CNG stations do you refuel at, or would you consider refueling at?

(21) Other general comments about this station
